# Supplementary material for: Revealing the Mechanisms of Enhanced β-Farnesene Production in Yarrowia lipolytica through Metabolomics Analysis
Source: MDPI journal article supplement (doi:10.3390/ijms242417366), 2023-12-11
Supplement: s1 [file s1]

**Supplementary Materials for:**

**Revealing the Mechanisms of Enhanced  $\beta$ -Farnesene Production in  
*Yarrowia lipolytica* through Metabolomics Analysis**

Qianxi Liu<sup>1</sup>, Haoran Bi<sup>1\*</sup>, Kai Wang<sup>1</sup>, Yang Zhang<sup>1</sup>, Biqiang Chen<sup>1</sup>, Huili Zhang<sup>1</sup>,  
Meng Wang<sup>1\*</sup>, Yunming Fang<sup>1</sup>

**Author affiliations**

<sup>1</sup> National Energy R&D Center of Biorefinery, College of Life Science and  
Technology, Beijing University of Chemical Technology, Beijing 100029, P.R.  
China

\* Correspondence: Author to whom correspondence should be addressed.

## Supplementary Figures

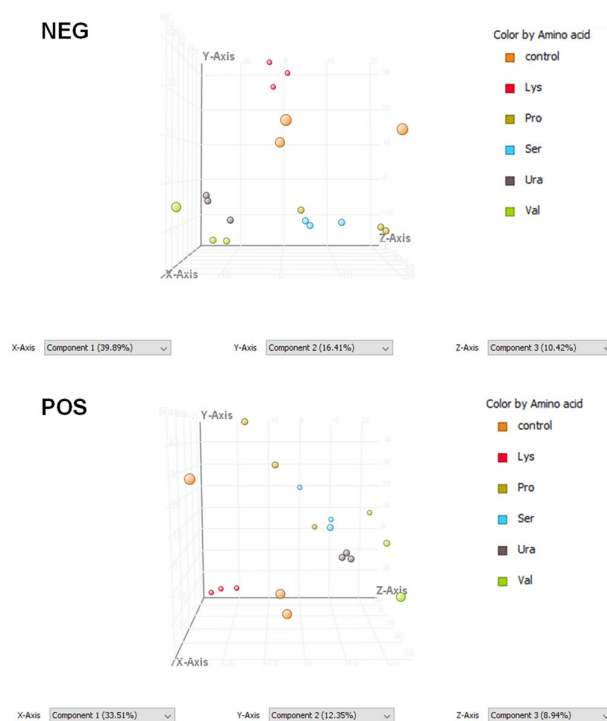

**Figure S1.** 3D PCA plot of different experimental groups in positive and negative polarity.

1

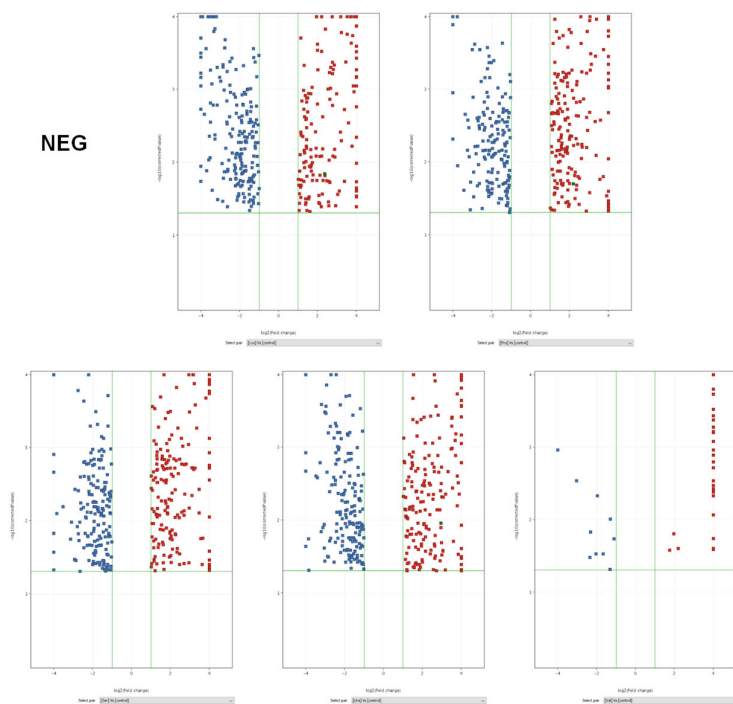

2

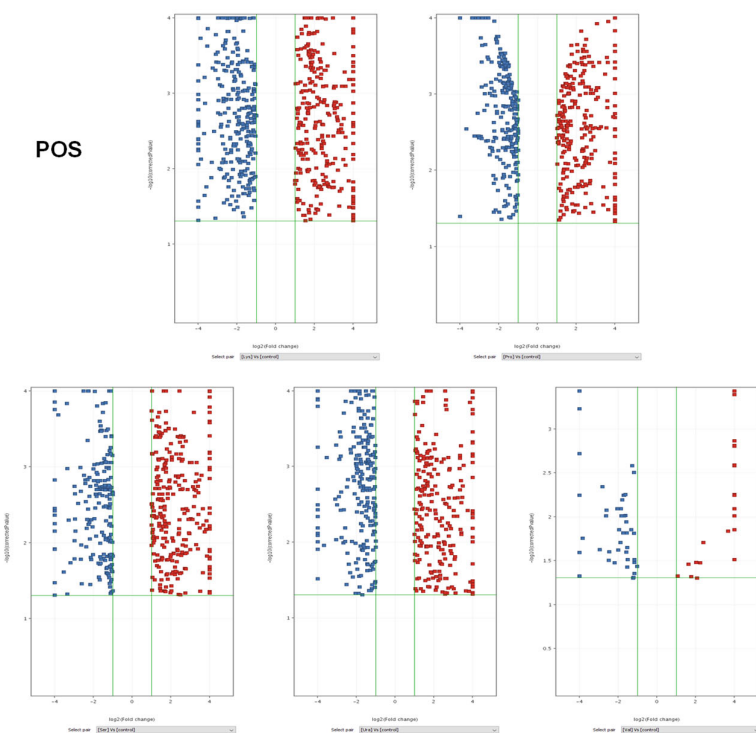

3

4 **Figure S2.** Volcano plot of metabolites under different amino acid/nucleobase

5 additions in positive and negative polarity.

## 6 Supplementary Tables

7

8 **Table S1.** Strains used in this study.

| Strains        | Genotype or characteristic                                                                                                                                        | Sources    |
|----------------|-------------------------------------------------------------------------------------------------------------------------------------------------------------------|------------|
| <i>E. coli</i> | Trans10                                                                                                                                                           | TransGen   |
| AYL119         | AYL101, pMO- <i>P<sub>TEFin</sub>-mmACL-T<sub>xpr2</sub>-P<sub>TEFin</sub>-ylAMPD-T<sub>xpr2</sub>-T<sub>xpr2</sub>-P<sub>TEFin</sub>-ylYHM2-T<sub>xpr2</sub></i> | [14]       |
| AYL119-1       | AYL119, pMO- <i>P<sub>TEFin</sub>-ylPanK-T<sub>lip2</sub></i>                                                                                                     | This study |
| AYL119-2       | AYL119, pMO- <i>P<sub>TEFin</sub>-ylPanL-T<sub>lip2</sub></i>                                                                                                     | This study |
| AYL119-3       | AYL119, pMO- <i>P<sub>TEFin</sub>-ylETNK-T<sub>lip2</sub></i>                                                                                                     | This study |
| AYL119-4       | AYL119, pMO- <i>P<sub>TEFin</sub>-ylPAP-T<sub>lip2</sub></i>                                                                                                      | This study |
| AYL119-5       | AYL119, pMO- <i>P<sub>TEFin</sub>-ylERG3-T<sub>lip2</sub></i>                                                                                                     | This study |
| AYL119-6       | AYL119, $\Delta$ <i>ylPAP::3HA</i>                                                                                                                                | This study |
| AYL119-7       | AYL119, $\Delta$ <i>ylERG3::3HA</i>                                                                                                                               | This study |

9 **Table S2.** Plasmids used in this study.

| Plasmids     | Description                                                          | Sources            |
|--------------|----------------------------------------------------------------------|--------------------|
| pMO          | Amp, mtOri, <i>URA3</i> marker, TEFin promoter and XPR2 terminator   | Laboratory storage |
| pRSF         | Kan, 3HA- <i>URA3</i> marker-3HA, TEFin promoter and XPR2 terminator | Laboratory storage |
| pMO-ylPanK   | <i>P<sub>TEFin</sub>-ylPanK-T<sub>lip2</sub></i>                     | This study         |
| pMO-ylPanL   | <i>P<sub>TEFin</sub>-ylPanL-T<sub>lip2</sub></i>                     | This study         |
| pMO-ylETNK   | <i>P<sub>TEFin</sub>-ylETNK-T<sub>lip2</sub></i>                     | This study         |
| pMO-ylPAP    | <i>P<sub>TEFin</sub>-ylPAP-T<sub>lip2</sub></i>                      | This study         |
| pMO-ylERG3   | <i>P<sub>TEFin</sub>-ylERG3-T<sub>lip2</sub></i>                     | This study         |
| pRSF- ylPAP  | <i>PAP<sub>up</sub>-3HA-URA3-3HA-PAP<sub>down</sub></i>              | This study         |
| pRSF- ylERG3 | <i>ERG3<sub>up</sub>-3HA-URA3-3HA-ERG3<sub>down</sub></i>            | This study         |

11 **Table S3.** List of primers used in this study.

| Names          | Sequences (5' > 3')                                        |
|----------------|------------------------------------------------------------|
| pMOvec-F       | GCTATTTATCACTCTTTACAACCTTCTACCTCAACTATC                    |
| pMOvec-R       | CTGCGGTTAGTACTGCAAAAAGTGCTG                                |
| ylPanK-F       | CTTTTTGCAGTACTAACCGCAGATGCAACAAGCAACACAGGA<br>ACTG         |
| ylPanK-R       | GTTGTAAAGAGTGATAAATAGCCTACTGCATGAAACGCTCCAA<br>CTCC        |
| ylPanL-F       | CTTTTTGCAGTACTAACCGCAGATGTTGCGACCGGTGATTCTG                |
| ylPanL-R       | GTTGTAAAGAGTGATAAATAGCTTAACACAGAACATTGTCAAT<br>GATTCTAGTCT |
| ylETNK-F       | CTTTTTGCAGTACTAACCGCAGATGTCGCAACCAACATACCCA<br>ATG         |
| ylETNK-R       | GTTGTAAAGAGTGATAAATAGCTTACTTTGCCTCTCTTCCCTTC<br>TTCC       |
| ylPAP-F        | CTTTTTGCAGTACTAACCGCAGATGTTGTCTTCCAGCTCCACCC<br>T          |
| ylPAP-R        | GTTGTAAAGAGTGATAAATAGCTTAAACCTGGTTCTCGAGCTG<br>AACATCG     |
| ylERG3-F       | CTTTTTGCAGTACTAACCGCAGATGGATATCGCTCTGGAGACCA<br>TCG        |
| ylERG3-R       | GTTGTAAAGAGTGATAAATAGCTTAATCCTGCTTGGTGTTCGC<br>TTGACA      |
| ylERG3-UP-F    | TTGCGTTGCGCCAATCTATACACTAGCCAGATGGCTTCTTTG                 |
| ylERG3-UP-R    | CGTTTTACAACGGCGGCAGGTGTGTGTGTC                             |
| ylERG3-DM-F    | TCTCTGTCTGCCATCTTTTGACCATGAAGCGAAGGACAAG                   |
| ylERG3-DM-R    | ATGCCTGCCATGATGATACACGAGAGAGAGAGATAGC                      |
| pRSF-ERG3vec-F | CGTGTATCATCATGGCAGGCATTTGAGAAGCACACGGTC                    |
| pRSF-ERG3vec-R | GTGTATAGATTGGCGCAACGCAATTAATGTAAGTTAGCTCA                  |
| ylERG3-3HA-F   | CCTGCCGCCGTTGTAAAACGACGGCCAGTCGAAC                         |
| ylERG3-3HA-R   | TGGTCAAAAGATGGCAGACAGAGAGGTGAAGAAGAGG                      |

---

|               |                                                  |
|---------------|--------------------------------------------------|
| ylPAP-UP-F    | GTTGCGCCTGGGGCAAGAAGTTTCCTGGC                    |
| ylPAP-UP-R    | CGTTTTACAAC TTTGGGTGCGGCAAAGTTGATTTTCAG          |
| ylPAP-DM-F    | CTCTGTCTGCCACCAAACCAAACAATATAAAAACGGATCTGTA<br>G |
| ylPAP-DM-R    | CAAATGCCTGAGAGGGTCCTCCTTGAGGCAG                  |
| pRSF-PAPvec-F | GGAGGACCCTCTCAGGCATTTGAGAAGCACACGG               |
| pRSF-PAPvec-R | CTTCTTGCCCCAGGCGCAACGCAATTAATGTAAGTTAGCTCAC      |
| ylPAP-3HA-F   | GCCGCACCCAAAGTTGTAAAACGACGGCCAGTCGAAC            |
| ylPAP-3HA-R   | TTGGTTTGGTGGCAGACAGAGAGGTGAAGAAGAGG              |

---

## 13   **References**

- 14       14. Bi, H.; Xu, C.; Bao, Y.; Zhang, C.; Wang, K.; Zhang, Y.; Wang, M.; Chen, B.; Fang, Y.;  
15       Tan, T. Enhancing precursor supply and modulating metabolism to achieve high-level  
16       production of  $\beta$ -farnesene in *Yarrowia lipolytica*. *Bioresour. Technol.* **2023**, 382, 129171.

17

18
